# Supplementary material for: Synthesis of N-doped porous carbon derived from biomass waste for activating peroxymonosulfate in water decontamination: mechanism insight and biotoxicity assessment
Source: Royal Society of Chemistry journal article supplement (doi:10.1039/d4en00481g), 2024-01-01
Supplement: d4en00481g1.pdf [file d4en00481g1.pdf]

# Supporting information

## Synthesis of N-doped porous carbon derived from biomass waste for activating peroxymonosulfate in water decontamination: Mechanism insight and biotoxicity assessment

*Shun Ding,<sup>a</sup> Fangyu Fu,<sup>a,b,\*</sup> Huibin Niu,<sup>a</sup> Jiaying Yan,<sup>a</sup> Yanfen Fang<sup>a,\*</sup> and Xiang Liu<sup>a,c,\*</sup>*

<sup>a</sup>Engineering Research Center of Eco-Environment in Three Gorges Reservoir Region of Ministry of Education, College of Materials and Chemical

Engineering, China Three Gorges University, Yichang, Hubei 443002, China. Email: fangyf@ctgu.edu.cn (Y. Fang) and xiang.liu@ctgu.edu.cn (X. Liu)

<sup>b</sup>School of Sciences, Great Bay University, Great Bay Institute for Advanced Study, Dongguan 523000, China. Email: fufangyu@gbu.edu.cn (F. Fu)

<sup>c</sup>Hubei Three Gorges Laboratory, Yichang, Hubei 443007, China.

\*Corresponding authors: fufangyu@gbu.edu.cn (F. Fu), fangyf@ctgu.edu.cn (Y. Fang) and xiang.liu@ctgu.edu.cn (X. Liu)

### Table of Contents

|                                                                                                                                                            |    |
|------------------------------------------------------------------------------------------------------------------------------------------------------------|----|
| 1. <b>Materials</b> .....                                                                                                                                  | S3 |
| 2. <b>Instruments</b> .....                                                                                                                                | S3 |
| 3. <b>Fig. S1.</b> (a) N <sub>2</sub> adsorption-desorption isotherms and (b) corresponding Barrett-Joyner-Halenda curve of the as-obtained catalysts..... | S4 |
| 4. <b>Fig. S2.</b> (a) SMX degradation catalyzed by as-obtained catalysts, (b) SMX absorption effect of NPCN and oxidation effect of PMS alone.....        | S4 |
| 5. <b>Fig. S3.</b> Sum EDS spectrum (up) and corresponding elemental proportions (down) of NPCN.....                                                       | S5 |
| 6. <b>Fig. S4.</b> Recycling test for NPCN catalyst in SMX degradation .....                                                                               | S5 |
| 7. <b>Fig. S5.</b> SEM image of NPCN after 5 times recycling.....                                                                                          | S6 |
| 8. <b>Fig. S6.</b> PXRD of NPCN before and after 5 times recycling.....                                                                                    | S6 |

|                                                                                                                                                                                    |     |
|------------------------------------------------------------------------------------------------------------------------------------------------------------------------------------|-----|
| 9. <b>Fig. S7.</b> Electronic quenching experiment in the NPCN/PMS system using AgNO <sub>3</sub> as electron scavenger.....                                                       | S7  |
| 10. <b>Fig. S8.</b> Negative HR-MS analysis of the final productions catalyzed by the NPCN/PMS system.....                                                                         | S7  |
| 11. <b>Fig. S9.</b> The possible degradation pathways of SMX in the NPCN/PMS system.....                                                                                           | S8  |
| 12. <b>Fig. S10.</b> Phenotype of representative wheat seeds cultivated by (a) SMX aqueous solution, (b) degraded SMX aqueous solution, and (c) deionized water at three days..... | S9  |
| 13. <b>Table S1.</b> Brunauer-Emmett-Teller (BET) results of the as-prepared samples.....                                                                                          | S9  |
| 14. <b>Table S2.</b> Comparison of previous reports on SMX degradation activated by PMS.....                                                                                       | S10 |
| 15. <b>Table S3.</b> Toxicity classification according to the Globally Harmonized System of Classification and Labelling of Chemicals (GHS).....                                   | S11 |
| 16. <b>Table S4.</b> Acute and chronic toxicity of SMX and its degraded intermediates to aquatic organisms estimated using ECOSAR.....                                             | S12 |
| 17. <b>Reference</b> .....                                                                                                                                                         | S13 |

## Materials

All solvents and chemicals were used as purchased, unless otherwise noted. The deionized water was produced in the laboratory. Dealkali lignin, dicyandiamide, were obtained from Shanghai Yien Chemical Technology Co., Ltd. Peroxymonosulfate (PMS) and L-histidine were purchased from Anhui Zesheng Technology Co., Ltd. Sulfamethoxazole (SMX), *t*-butanol (TBA), sulfadiazine and 3-aminophenol were obtained from Shanghai Aladdin Biochemical Co., Ltd. Bisphenol A was purchased from Shanghai Xushuo Biotechnology Co., Ltd. Ciprofloxacin was bought from Tianjin Xiensi Biochemical Technology Co., Ltd. Tetracycline, melamine and urea were obtained from Shanghai Macklin Biochemical Co., Ltd. Trichloromethane ( $\text{CHCl}_3$ ), ethanol (EtOH) was purchased from Shanghai Hushi Laboratory Equipment Co., Ltd. Sodium dihydrogen phosphate dihydrate ( $\text{NaH}_2\text{PO}_4 \cdot 2\text{H}_2\text{O}$ , AR, 99%, Sinopharm Chemical Reagent Co., Ltd.), sodium bicarbonate ( $\text{NaHCO}_3$ , AR, 99.8%, Shanghai Macklin Biochemical Co., Ltd.), sodium chloride ( $\text{NaCl}$ , AR, Sinopharm Chemical Reagent Co., Ltd.), potassium sulfate ( $\text{K}_2\text{SO}_4$ , AR, 99% Shanghai Macklin Biochemical Co., Ltd.), sodium nitrate ( $\text{NaNO}_3$ , AR, 99%, Tianjin Hengxing Chemical Reagent Manufacturing Co.), and humic acid (HA, 70%, Shanghai Aladdin BioChemical Technology Co., Ltd.) were utilized as received.

## Instruments

UV-vis spectra were conducted on Metash UV-8000S. Powder X-ray diffraction (PXRD) analyses were carried out on an Germany-Bruke D8 Advance. Fourier-Transform Infrared Spectrometer (FTIR) spectra of the catalysts were performed on a Thermo Nicolet iS5. Raman was recorded on HORIBA-EVA.  $\text{N}_2$  adsorption/desorption isotherms of as-obtained materials were carried out on ASAP-2460. The morphologies of the catalysts were observed by scanning transmission electron microscopy (JEOL-JEM 2100 F) and scanning electron microscopy (Sigma 300). Energy Dispersive Spectrometer (EDS) mapping was conducted with a microscope (Oxford 80T) operated at 200 kV. X-ray photoelectron microscopy (XPS) spectra were measured on a Thermo Scientific

ESCALAB 250Xi using a monochromate Al X-ray resource at a C1s 284.8 eV reference. Electron paramagnetic resonance (EPR) spectroscopy was performed on a Germany-Bruke-A300. High resolution mass spectrometry (HRMS) was collected using Aglient 6540 TOF.

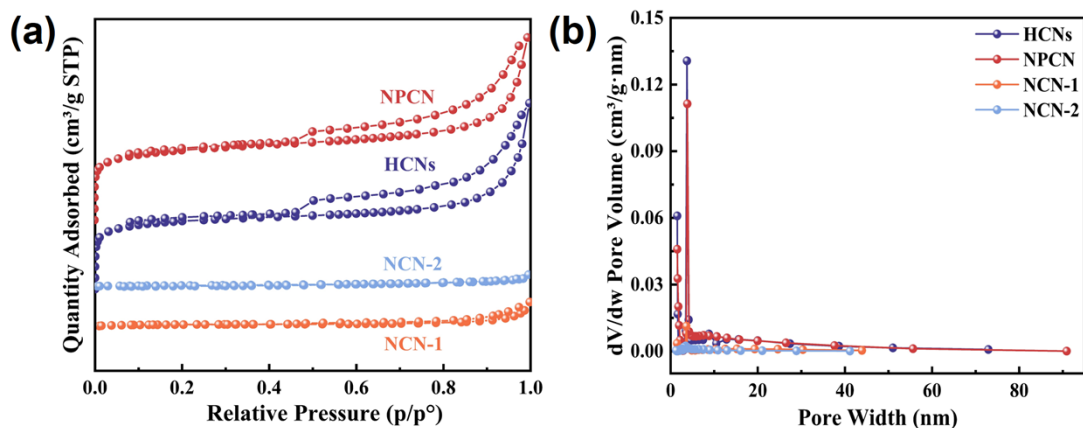

**Fig. S1.** (a) N<sub>2</sub> adsorption-desorption isotherms and (b) corresponding Barrett-Joyner-Halenda curve of the as-obtained catalysts.

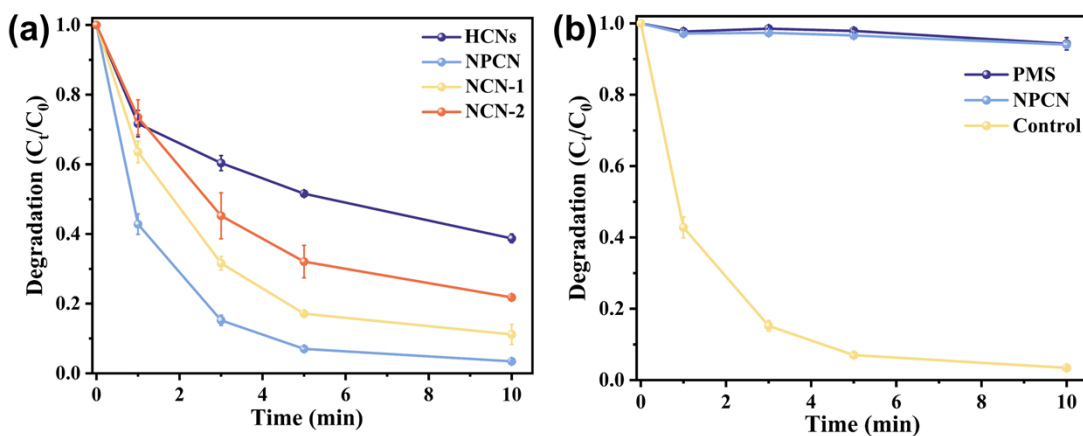

**Fig. S2.** (a) SMX degradation catalyzed by as-obtained catalysts, (b) SMX absorption effect of NPCN and oxidation effect of PMS alone. Standard conditions: 50 mL SMX (20 mg/L), 25 mg Catalyst, and 25 mg PMS at 30 °C.

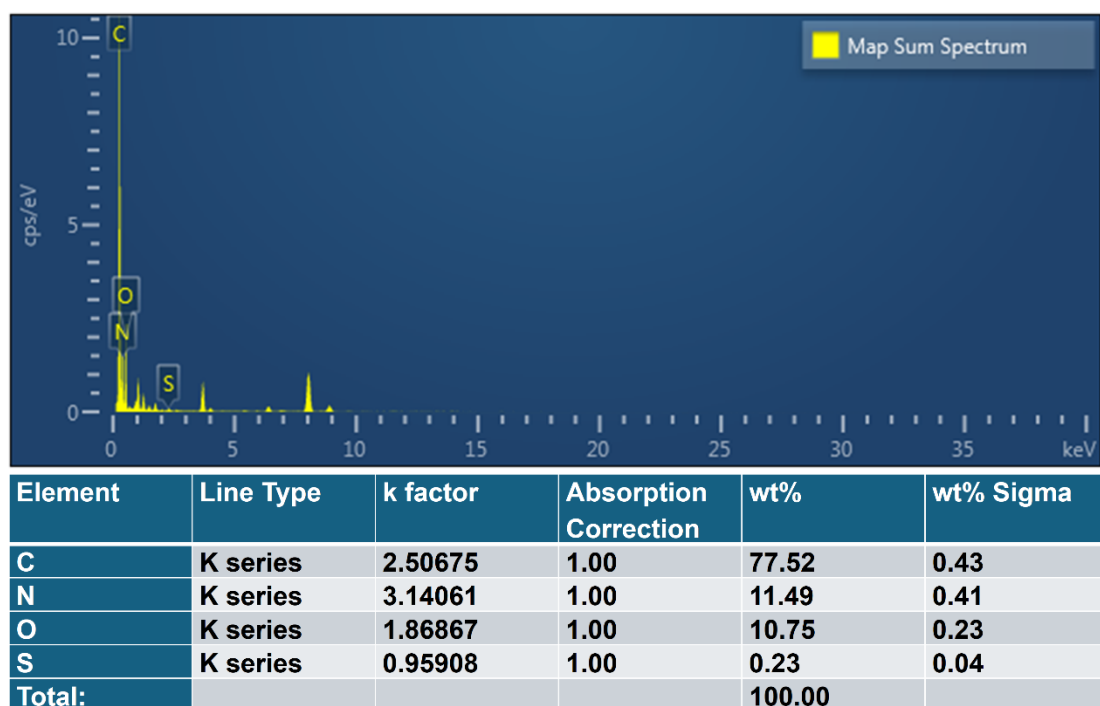

**Fig. S3.** Sum EDS spectrum (up) and corresponding elemental proportions (down) of NPCN.

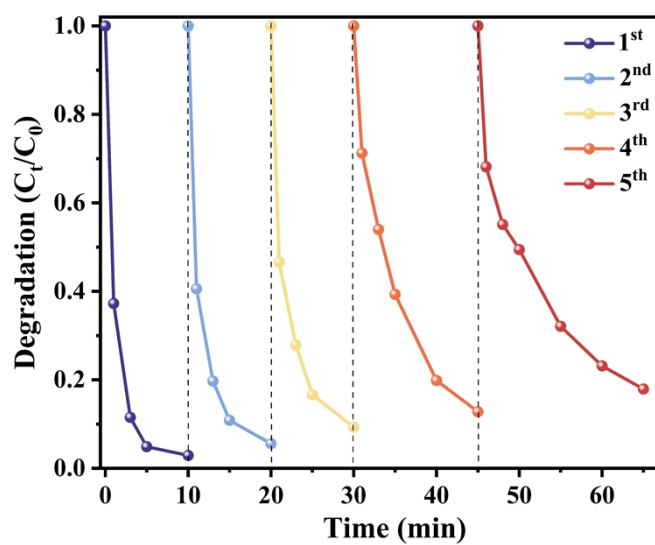

**Fig. S4.** Recycling test for the NPCN catalyst in SMX degradation.

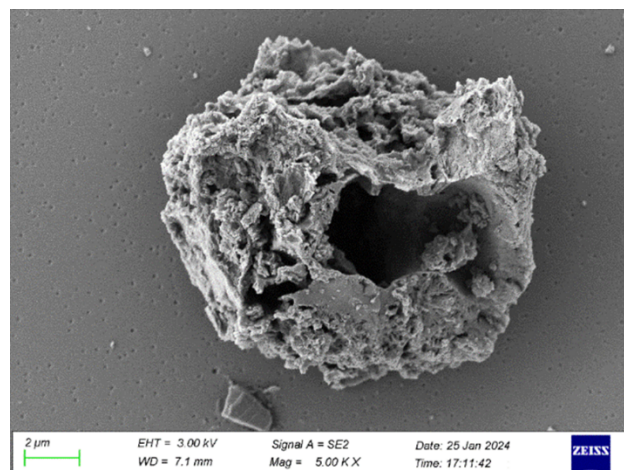

Fig. S5. SEM image of the NPCN after 5 times recycling.

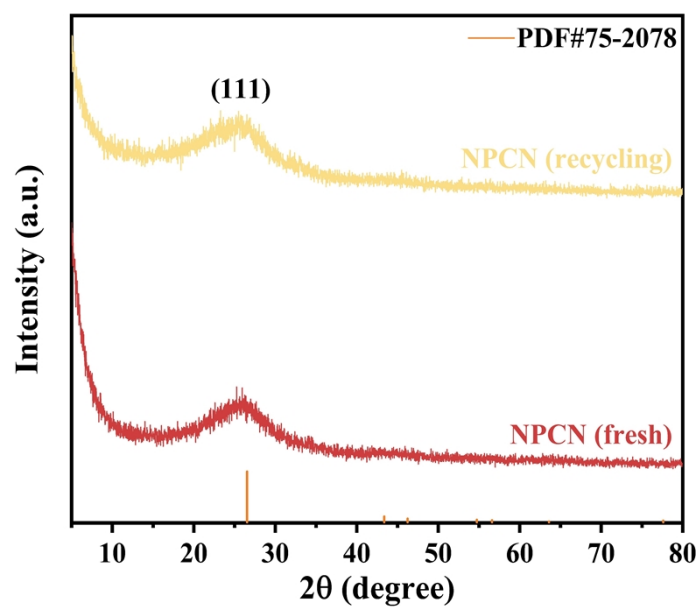

Fig. S6. PXRD of NPCN before and after 5 times recycling.

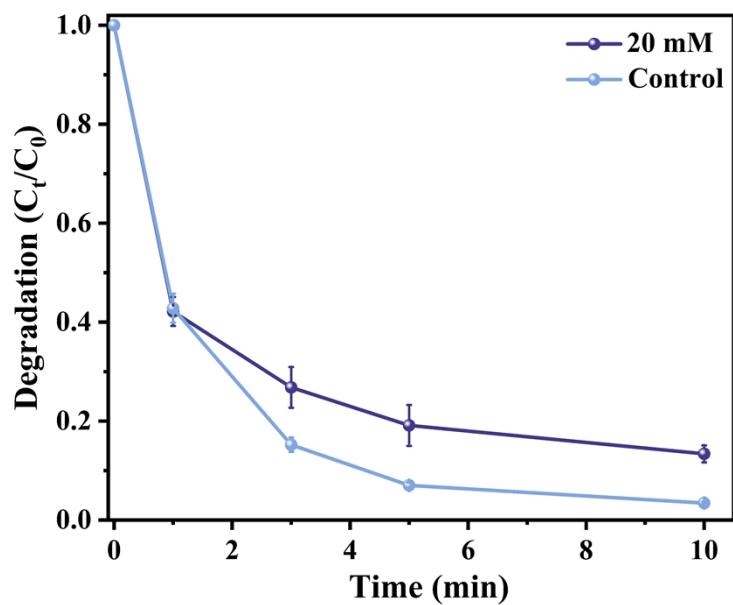

**Fig. S7.** Electronic quenching experiment in the NPCN/PMS system using  $\text{AgNO}_3$  as electron scavenger.

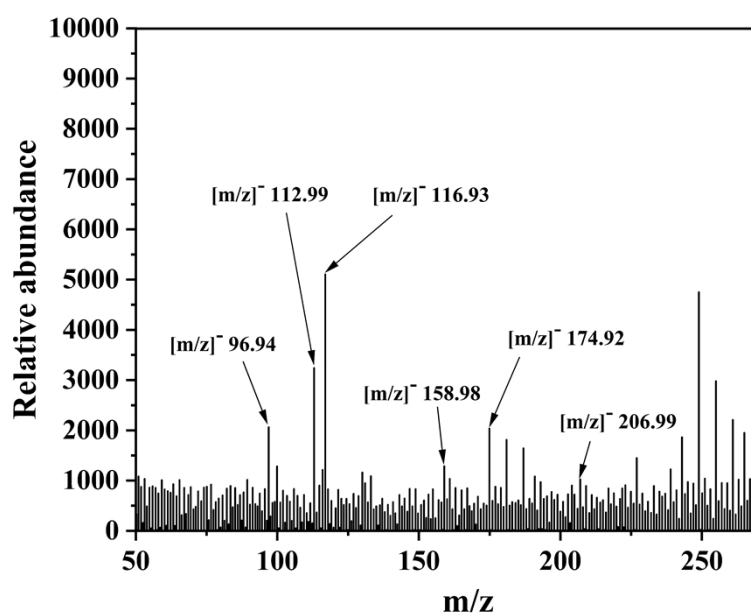

**Fig. S8.** Negative HR-MS analysis of the final productions catalyzed by the NPCN/PMS system.

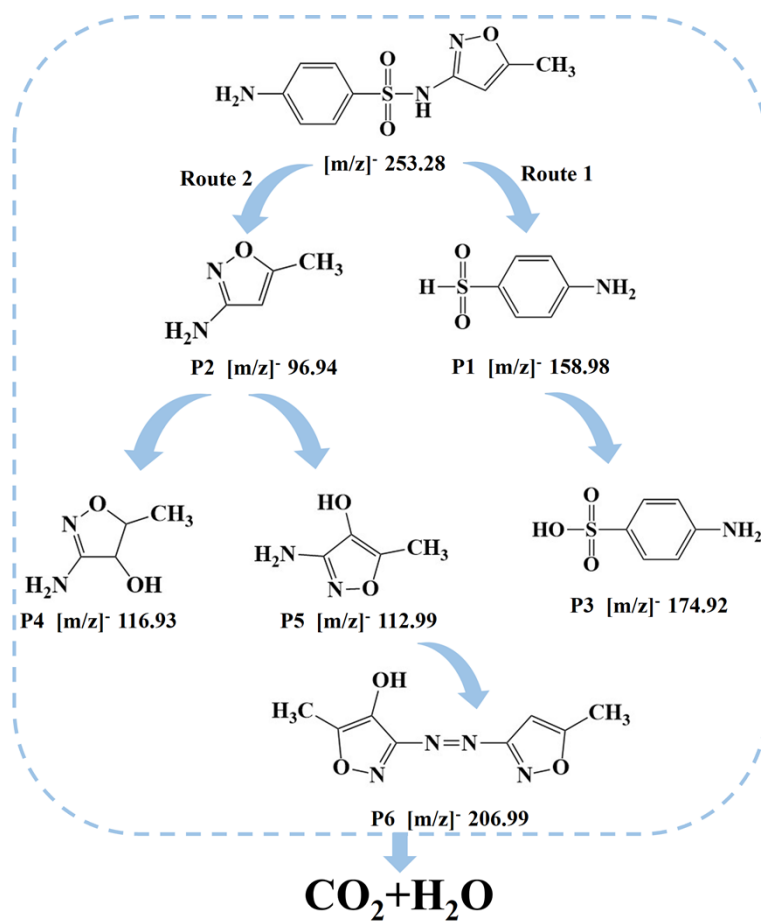

**Fig. S9.** The possible degradation pathways of SMX in the NPCN/PMS system.

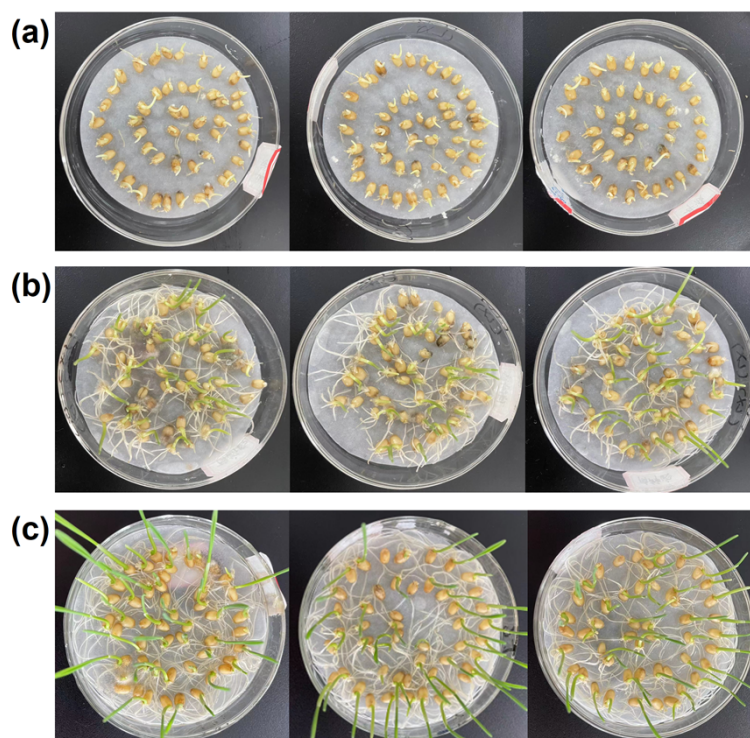

**Fig. S10.** Phenotype of representative wheat seeds cultivated by (a) SMX aqueous solution, (b) degraded SMX aqueous solution, and (c) deionized water at three days.

**Table S1.** Brunauer-Emmett-Teller (BET) results of the as-prepared samples.

| Samples | Surface Area ( $\text{m}^2\text{g}^{-1}$ ) | Pore Volume ( $\text{cm}^3\text{g}^{-1}$ ) | Pore Size (nm) |
|---------|--------------------------------------------|--------------------------------------------|----------------|
| HCNs    | 358.46                                     | 0.42                                       | 4.63           |
| NCN-1   | 16.62                                      | 0.06                                       | 13.37          |
| NCN-2   | 6.76                                       | 0.02                                       | 14.60          |
| NPCN    | 369.92                                     | 0.42                                       | 4.58           |

**Table S2.** Comparison of previous reports on SMX degradation activated by PMS.

| Entry | Contaminant      | Catalyst                                                         | Oxidant          | Degradation efficiency | Time    | Ref.      |
|-------|------------------|------------------------------------------------------------------|------------------|------------------------|---------|-----------|
| 1     | SMX<br>(20 mg/L) | NPCN<br>(0.5 g/L)                                                | PMS<br>(0.5 g/L) | 96.6%                  | 10 min  | This work |
| 2     | SMX<br>(10 mg/L) | C-N-M<br>(0.1 g/L)                                               | PMS<br>(0.5 mM)  | 95.0%                  | 30 min  | [S1]      |
| 3     | SMX<br>(10 mg/L) | BMNSBC<br>(0.4 g/L)                                              | PMS<br>(1 mM)    | 100%                   | 60 min  | [S2]      |
| 4     | SMX<br>(5 mg/L)  | Fe-DA-CN<br>(50 mg/L)                                            | PMS<br>(0.5 mM)  | 99%                    | 30 min  | [S3]      |
| 5     | SMX<br>(20 mg/L) | CoNi-600@NC<br>(25 mg/L)                                         | PMS<br>(0.3 mM)  | 100%                   | 25 min  | [S4]      |
| 6     | SMX<br>(10 mg/L) | CN@FeMn-10-800<br>(0.15 g/L)                                     | PMS<br>(0.2 g/L) | 91.2%                  | 60 min  | [S5]      |
| 7     | SMX<br>(0.04 mM) | Fe <sub>0</sub> @Fe <sub>3</sub> O <sub>4</sub> -MC<br>(0.1 g/L) | PMS<br>(3 mM)    | 100%                   | 120 min | [S6]      |
| 8     | SMX<br>(5 mg/L)  | BOSBC<br>(0.14 g/L)                                              | PMS<br>(1 mM)    | 98.6%                  | 60 min  | [S7]      |
| 9     | SMX<br>(10 mg/L) | BNSBC<br>(0.4 g/L)                                               | PMS<br>(1 mM)    | 92.1%                  | 60 min  | [S8]      |
| 10    | SMX<br>(20 mg/L) | CoS/BBC<br>(0.02 g/L)                                            | PMS<br>(0.3 g/L) | 99.12%                 | 10 min  | [S9]      |

**Table S3.** Toxicity classification according to the Globally Harmonized System of Classification and Labelling of Chemicals (GHS).

| Toxicity range (mg L <sup>-1</sup> ) | Class       |
|--------------------------------------|-------------|
| $LC_{50}/ChV \leq 1$                 | Very toxic  |
| $1 < LC_{50} / ChV \leq 10$          | Toxic       |
| $10 < LC_{500} / ChV \leq 100$       | Harmful     |
| $LC_{50} / ChV > 100$                | Not harmful |

**Table S4.** Acute and chronic toxicity of SMX and its degraded intermediates to aquatic organisms estimated using ECOSAR.

| Compound | Acute toxicity (mg L <sup>-1</sup> ) |                                        |                                         | Chronic toxicity (mg L <sup>-1</sup> ) |                  |                      |
|----------|--------------------------------------|----------------------------------------|-----------------------------------------|----------------------------------------|------------------|----------------------|
|          | Fish<br>(LC <sub>50</sub> -96<br>h)  | Daphind<br>(LC <sub>50</sub> -48<br>h) | Green algae<br>(LC <sub>50</sub> -96 h) | Fish<br>(ChV)                          | Daphind<br>(ChV) | Green algae<br>(ChV) |
| SMX      | 267.00                               | 6.43                                   | 21.80                                   | 5.00                                   | 0.068            | 11.10                |
| P1       | 1330.00                              | 9.05                                   | 39.00                                   | 44.00                                  | 0.084            | 35.40                |
| P2       | 270.00                               | 3.63                                   | 13.80                                   | 6.59                                   | 0.036            | 9.16                 |
| P3       | 11200.00                             | 5220.00                                | 1740.00                                 | 868.00                                 | 296.00           | 295.00               |
| P4       | 1990.00                              | 168.00                                 | 274.00                                  | 331.00                                 | 9.85             | 70.90                |
| P5       | 646.00                               | 5.61                                   | 23.10                                   | 19.20                                  | 0.054            | 18.80                |
| P6       | 954.00                               | 502.00                                 | 272.00                                  | 85.20                                  | 39.50            | 60.10                |

## Reference

- S1. W. Wang and M. Chen, Catalytic degradation of sulfamethoxazole by peroxymonosulfate activation system composed of nitrogen-doped biochar from pomelo peel: Important roles of defects and nitrogen, and detoxification of intermediates, *J. Colloid Interface Sci.*, 2022, **613**, 57–70.
- S2. R. Mu, Y. Ma, Y. Ding, C. Zeng, X. Chen, J. Zhu, Z. Deng and Z. Zhang, Radical/non-radicals oxidative degradation of sulfamethoxazole via peroxymonosulfate activation by ball milling and N-doping co-functionalized sludge biochar, *J. Water Process. Eng.*, 2024, **63**, 105479.
- S3. X. Liu, L. Wang, F. Qian, Z. Qing, X. Xie and Y. Song, Ferric nitrate/dopamine/melamine-derived nitrogen doped carbon material as the activator of peroxymonosulfate to degrade sulfamethoxazole, *Sep. Purif. Technol.*, 2022, **281**, 119844.
- S4. Z. Liu, X. Sun and Z. Sun, CoNi alloy anchored onto N-doped porous carbon for the removal of sulfamethoxazole: Catalyst, mechanism, toxicity analysis, and application, *Chemosphere*, 2022, **308**, 136291.
- S5. Z. Meng, W. Wang, Z. Liu, L. Wang, K. Zheng, W. Li and C. Qin, Starch of oat derived nanostructured Fe/Mn bimetallic carbon materials for sulfamethoxazole degradation via peroxymonosulfate activation, *Int. J. Biol. Macromol.*, 2024, **256**, 128400.
- S6. S. Wang and J. Wang, Synergistic effect of PMS activation by Fe<sub>0</sub>@Fe<sub>3</sub>O<sub>4</sub> anchored on N, S, O co-doped carbon composite for degradation of sulfamethoxazole, *Chem. Eng. J.*, 2022, **427**, 131960.
- S7. X. Chen, J. Zhu, Y. Ma, C. Zeng, R. Mu, Z. Deng and Z. Zhang, Facile synthesis of ball-milling and oxalic acid co-modified sludge biochar to efficiently activate peroxymonosulfate for sulfamethoxazole degradation: <sup>1</sup>O<sub>2</sub> and surface-bound radicals, *J. Hazard. Mater.*, 2024, **465**, 133026.
- S8. H. Wang, Q. Zhang, H. Ji, Y. Zhang, B. Fu, Y. Wu and Y. Ding, Boron and nitrogen hydrothermal co-doped sludge biochar towards efficiently activate peroxymonosulfate for sulfamethoxazole degradation, *J. Clean. Prod.*, 2024, **466**, 142843.
- S9. X. Huang, Z. Yu, Y. Shi, Q. Liu and S. Fang, Highly efficient activation of peroxymonosulfate by Co, S co-doped bamboo biochar for sulfamethoxazole degradation: Insights into the role of S, *J. Environ. Chem. Eng.*, 2022, **10**, 108380.
